# Supplementary material
Source: Springer Nature journal article supplement (https://www.springermedizin.de/resource/supplementary/12906_2012_1421_MOESM3_ESM.pdf/9521876)

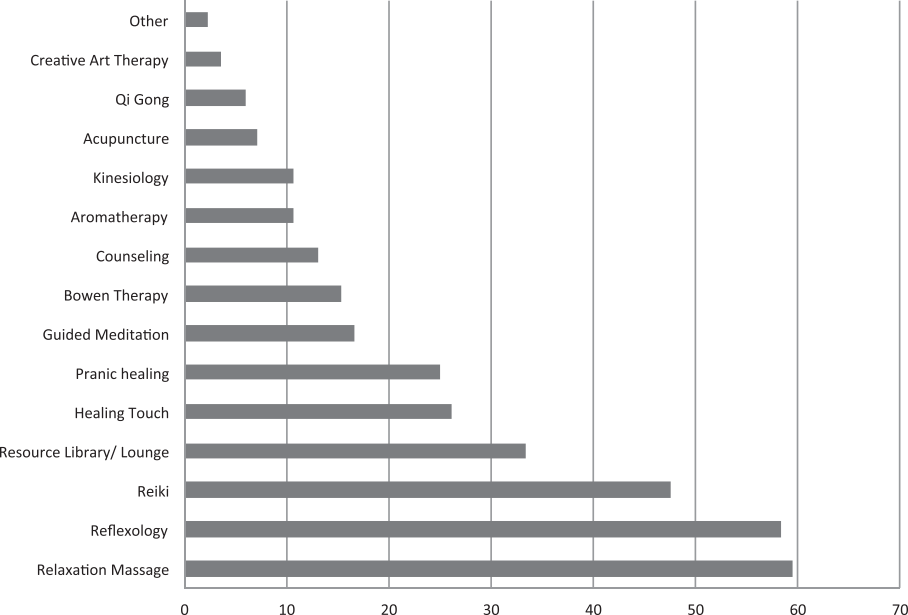

Supplement: MOESM3 [file 9521876]
